# Supplementary material
Source: PubMed Central journal article supplement (PMC3378958)
Supplement: Supp_Data.pdf [file Supp_Data.pdf]

## Supplementary Data

SUPPLEMENTARY TABLE S1. ASSOCIATIONS OF OBSCN POLYMORPHISMS WITH FORCED EXPIRATORY VOLUME IN 1 s DECLINE BY ASPIRIN PROVOCATION IN TOTAL ASTHMATICS

| SNP (AA change)        | Position  | Genotype distribution |                   |                   | Pa          | Pb   | Pc          |
|------------------------|-----------|-----------------------|-------------------|-------------------|-------------|------|-------------|
|                        |           | C/C                   | C/R               | R/R               |             |      |             |
| rs10157526A>G          | Intron 8  | 413 (9.52±12.89)      | 166 (8.56±14.17)  | 13 (8.84±11.60)   | 0.58        | 0.59 | 0.79        |
| rs10916282C>A          | Intron 8  | 414 (9.53±12.88)      | 165 (8.52±14.20)  | 13 (8.84±11.60)   | 0.55        | 0.56 | 0.79        |
| rs12063816A>G          | Intron 8  | 481 (9.38±13.10)      | 106 (8.49±13.72)  | 4 (12.75±18.19)   | 0.85        | 0.78 | 0.68        |
| rs1757157T>C           | Intron 8  | 294 (8.96±13.97)      | 255 (9.69±12.74)  | 43 (8.39±10.62)   | 0.97        | 0.66 | 0.45        |
| rs17640616G>C          | Intron 8  | 518 (9.39±13.19)      | 73 (8.23±13.55)   | 1 (0.00)          | 0.33        | 0.36 | 0.57        |
| rs1757149T>C           | Intron 9  | 244 (9.97±12.55)      | 276 (8.65±13.62)  | 72 (8.98±13.90)   | 0.41        | 0.32 | 0.86        |
| rs1629294T>G           | Intron 9  | 228 (9.83±12.18)      | 280 (8.62±13.45)  | 81 (9.88±15.33)   | 0.80        | 0.50 | 0.66        |
| rs1771462C>G           | Intron 9  | 243 (9.88±11.91)      | 275 (8.57±13.78)  | 74 (9.55±15.11)   | 0.67        | 0.43 | 0.77        |
| rs2776856T>C           | Intron 9  | 232 (10.01±12.13)     | 278 (8.45±13.33)  | 82 (9.71±15.62)   | 0.67        | 0.37 | 0.67        |
| rs2776855A>C           | Intron 9  | 401 (9.50±12.94)      | 176 (8.73±14.12)  | 15 (8.10±9.88)    | 0.50        | 0.56 | 0.59        |
| rs10916287C>T          | Intron 9  | 399 (9.49±12.81)      | 176 (8.83±14.35)  | 17 (7.38±10.67)   | 0.56        | 0.70 | 0.45        |
| rs11586055C>G          | Intron 9  | 469 (9.31±13.06)      | 115 (8.89±14.12)  | 8 (9.73±10.22)    | 0.95        | 0.95 | 0.99        |
| rs1771459G>A           | Intron 9  | 250 (9.84±12.07)      | 270 (8.54±13.66)  | 72 (9.75±15.28)   | 0.73        | 0.45 | 0.66        |
| rs1757133C>T           | Intron 9  | 401 (9.50±12.94)      | 176 (8.73±14.12)  | 15 (8.10±9.88)    | 0.50        | 0.56 | 0.59        |
| rs6701173G>A           | Intron 9  | 339 (9.83±13.93)      | 229 (8.20±12.25)  | 24 (10.70±11.67)  | 0.45        | 0.27 | 0.54        |
| rs3856331G>A           | Intron 9  | 339 (9.83±13.93)      | 229 (8.20±12.25)  | 24 (10.70±11.67)  | 0.45        | 0.27 | 0.54        |
| rs12077365T>C          | Intron 11 | 399 (9.49±12.81)      | 176 (8.83±14.35)  | 17 (7.38±10.67)   | 0.56        | 0.70 | 0.45        |
| rs1888680A>T           | Intron 12 | 203 (8.59±13.55)      | 295 (9.08±13.31)  | 94 (11.08±12.16)  | 0.29        | 0.51 | 0.26        |
| rs6426493G>A           | Intron 12 | 198 (8.68±13.70)      | 295 (9.02±13.07)  | 99 (10.96±12.67)  | 0.34        | 0.59 | 0.27        |
| rs1411912C>A           | Intron 13 | 202 (8.61±13.58)      | 296 (9.07±13.28)  | 94 (11.08±12.16)  | 0.29        | 0.51 | 0.26        |
| rs10158275G>T          | Intron 14 | 190 (9.35±11.99)      | 318 (9.61±14.38)  | 83 (7.61±11.19)   | 0.64        | 0.81 | 0.23        |
| rs4653544G>A           | Intron 14 | 286 (9.01±13.92)      | 252 (9.25±12.77)  | 54 (10.37±11.53)  | 0.70        | 0.76 | 0.73        |
| rs287606G>A            | Intron 15 | 356 (9.76±13.93)      | 216 (8.18±12.02)  | 20 (11.28±12.38)  | 0.49        | 0.28 | 0.44        |
| rs397637G>T            | Intron 16 | 356 (9.76±13.93)      | 217 (8.20±11.99)  | 19 (11.24±12.72)  | 0.48        | 0.28 | 0.43        |
| rs391597A>T            | Intron 16 | 356 (9.76±13.93)      | 217 (8.20±11.99)  | 19 (11.24±12.72)  | 0.48        | 0.28 | 0.43        |
| rs1108210A>C           | Intron 16 | 397 (9.51±12.84)      | 177 (8.84±14.31)  | 18 (7.14±10.41)   | 0.52        | 0.67 | 0.39        |
| rs878388G>A            | Intron 16 | 204 (8.30±13.24)      | 299 (9.29±13.32)  | 89 (11.20±12.74)  | 0.16        | 0.27 | 0.24        |
| rs549590T>C            | Intron 17 | 354 (9.80±13.96)      | 219 (8.14±11.95)  | 19 (11.24±12.72)  | 0.42        | 0.23 | 0.43        |
| rs424645C>T            | Intron 17 | 348 (9.90±14.05)      | 225 (8.04±11.82)  | 19 (11.24±12.72)  | 0.34        | 0.18 | 0.43        |
| rs1188722C>T (L2116F)  | Exon 23   | 329 (8.24±12.83)      | 221 (10.06±13.56) | 41 (12.96±13.84)  | <b>0.03</b> | 0.06 | 0.09        |
| rs867599C>A            | Intron 25 | 349 (8.56±12.79)      | 209 (10.09±13.87) | 34 (10.92±13.45)  | 0.21        | 0.21 | 0.55        |
| rs3795782T>C           | Intron 27 | 384 (9.33±12.58)      | 188 (9.37±14.71)  | 20 (6.18±10.16)   | 0.66        | 0.94 | 0.26        |
| rs11581037C>G          | Intron 28 | 476 (9.36±13.23)      | 108 (8.65±13.43)  | 8 (9.73±10.22)    | 0.79        | 0.77 | 0.99        |
| rs12061320G>A (V2648V) | Exon 31   | 269 (9.61±13.13)      | 262 (8.92±13.46)  | 61 (8.94±12.70)   | 0.57        | 0.57 | 0.76        |
| rs3795785C>T (R2812W)  | Exon 32   | 301 (9.05±12.66)      | 247 (9.46±14.01)  | 44 (9.21±12.61)   | 0.84        | 0.75 | 0.88        |
| rs1150906G>T           | Intron 33 | 346 (9.98±14.05)      | 223 (8.08±11.85)  | 23 (9.22±12.58)   | 0.22        | 0.14 | 0.89        |
| rs3795790A>T (S3373C)  | Exon 39   | 266 (9.48±12.92)      | 260 (8.88±13.44)  | 61 (8.94±12.70)   | 0.65        | 0.64 | 0.81        |
| rs4653938C>G           | Intron 39 | 163 (9.04±14.15)      | 286 (8.79±12.90)  | 143 (10.34±12.78) | 0.46        | 0.88 | 0.28        |
| rs1150909C>T           | Intron 43 | 328 (8.41±13.01)      | 222 (9.79±13.34)  | 41 (13.08±13.76)  | 0.06        | 0.13 | 0.08        |
| rs1150910C>T           | Intron 44 | 347 (9.94±14.04)      | 224 (8.10±11.82)  | 21 (9.65±13.10)   | 0.26        | 0.16 | 0.77        |
| rs207951A>T            | Intron 50 | 327 (8.34±12.98)      | 223 (9.87±13.39)  | 42 (12.77±13.73)  | 0.05        | 0.11 | 0.11        |
| rs2087121G>A           | Intron 50 | 164 (9.02±14.10)      | 283 (8.75±12.90)  | 145 (10.40±12.82) | 0.43        | 0.86 | 0.25        |
| rs1188729G>C (C4642S)  | Exon 54   | 328 (8.41±13.01)      | 223 (9.74±13.33)  | 41 (13.08±13.76)  | 0.06        | 0.14 | 0.08        |
| rs6700528G>A           | Intron 57 | 186 (9.78±12.78)      | 290 (9.08±13.23)  | 116 (8.75±13.95)  | 0.46        | 0.50 | 0.61        |
| rs369909G>C (L5269V)   | Exon 59   | 348 (9.94±14.02)      | 212 (7.60±11.23)  | 21 (9.65±13.10)   | 0.16        | 0.08 | 0.72        |
| rs1188710C>G (E5891Q)  | Exon 73   | 185 (8.16±12.20)      | 310 (9.50±13.97)  | 96 (10.48±12.63)  | 0.20        | 0.20 | 0.48        |
| rs369252C>A            | Intron 76 | 328 (8.42±13.01)      | 222 (9.58±13.22)  | 42 (13.72±14.21)  | <b>0.04</b> | 0.15 | <b>0.03</b> |
| rs12096217G>A          | Intron 76 | 481 (9.24±12.95)      | 103 (9.15±14.51)  | 8 (10.23±13.94)   | 0.92        | 0.96 | 0.83        |
| rs729258C>T            | Intron 77 | 333 (10.17±14.22)     | 233 (7.96±11.73)  | 26 (8.65±11.96)   | 0.14        | 0.08 | 0.99        |
| rs3795811C>T           | Intron 78 | 278 (9.42±13.00)      | 260 (8.97±13.52)  | 54 (9.54±13.10)   | 0.79        | 0.71 | 0.96        |
| rs3795812A>G           | Intron 79 | 322 (10.35±14.20)     | 240 (7.75±11.86)  | 29 (9.28±11.99)   | 0.11        | 0.05 | 0.82        |
| rs3795814C>T           | Intron 80 | 270 (9.48±12.90)      | 264 (9.05±13.66)  | 58 (8.93±12.84)   | 0.64        | 0.67 | 0.75        |
| rs16848509C>T          | Intron 81 | 185 (8.16±12.20)      | 311 (9.49±13.95)  | 96 (10.48±12.63)  | 0.20        | 0.20 | 0.48        |
| rs11582927C>T          | Intron 81 | 409 (9.47±13.05)      | 167 (8.44±13.77)  | 10 (7.61±7.77)    | 0.38        | 0.43 | 0.54        |
| rs12061490A>G          | Intron 81 | 278 (9.42±13.00)      | 259 (8.79±13.25)  | 55 (10.35±14.31)  | 0.98        | 0.71 | 0.56        |

Genotype distribution of each SNP is presented as the number of subjects (FEV1 decline%, mean±SEM).

p-Values are adjusted with initial diagnosed age, sex, smoking, atopy, and body mass index.

Bold values indicate the statistical significance ( $p < 0.05$ ).

C/C, C/R, and R/R indicate the homozygote of the common allele, and the heterozygote and homozygote of the rare allele, respectively.

Pa, Pb, and Pc indicate the p-value of co-dominant, dominant, and recessive models, respectively.

SNP, single-nucleotide polymorphism; AA, amino acid; FEV1, forced expiratory volume in 1 s; SEM, standard error of the mean.

SUPPLEMENTARY TABLE S2. ASSOCIATIONS OF *OBSCN* POLYMORPHISMS WITH FORCED EXPIRATORY VOLUME IN 1 s DECLINE BY ASPIRIN PROVOCATION IN ASPIRIN EXACERBATED RESPIRATORY DISEASE SUBJECTS

| SNP (AA change)                  | Position | Genotype distribution |                  |                  | <i>P<sub>a</sub></i> | <i>P<sub>b</sub></i> | <i>P<sub>c</sub></i> |
|----------------------------------|----------|-----------------------|------------------|------------------|----------------------|----------------------|----------------------|
|                                  |          | C/C                   | C/R              | R/R              |                      |                      |                      |
| <i>rs10157526A&gt;G</i>          | Intron8  | 119 (23.61±15.52)     | 39 (26.98±18.44) | 5 (16.98±14.35)  | 0.58                 | 0.32                 | 0.36                 |
| <i>rs10916282C&gt;A</i>          | Intron8  | 120 (23.55±15.47)     | 38 (27.26±18.60) | 5 (16.98±14.35)  | 0.54                 | 0.28                 | 0.36                 |
| <i>rs12063816A&gt;G</i>          | Intron8  | 134 (24.25±15.82)     | 28 (23.51±18.50) | 1 (39.00)        | 0.81                 | 0.95                 | 0.36                 |
| <i>rs1757157T&gt;C</i>           | Intron8  | 83 (23.74±18.08)      | 69 (25.54±13.92) | 11 (19.42±15.53) | 0.85                 | 0.79                 | 0.32                 |
| <i>rs17640616G&gt;C</i>          | Intron8  | 145 (24.09±16.21)     | 18 (25.16±16.99) | .                | 0.76                 | 0.76                 | .                    |
| <i>rs1757149T&gt;C</i>           | Intron9  | 76 (23.11±14.38)      | 66 (25.79±17.65) | 21 (23.26±18.34) | 0.61                 | 0.40                 | 0.86                 |
| <i>rs1629294T&gt;G</i>           | Intron9  | 71 (22.52±13.87)      | 66 (25.90±17.44) | 26 (24.54±19.11) | 0.34                 | 0.23                 | 0.81                 |
| <i>rs1771462C&gt;G</i>           | Intron9  | 78 (22.01±13.39)      | 61 (27.35±17.93) | 24 (23.37±19.43) | 0.25                 | 0.08                 | 0.90                 |
| <i>rs2776856T&gt;C</i>           | Intron9  | 77 (22.05±13.47)      | 59 (27.32±17.28) | 27 (23.59±20.30) | 0.25                 | 0.09                 | 0.97                 |
| <i>rs2776855A&gt;C</i>           | Intron9  | 116 (23.92±15.08)     | 43 (25.45±19.45) | 4 (19.24±13.42)  | 0.94                 | 0.76                 | 0.50                 |
| <i>rs10916287C&gt;T</i>          | Intron9  | 116 (23.54±15.16)     | 42 (26.93±19.05) | 5 (16.98±14.35)  | 0.53                 | 0.28                 | 0.36                 |
| <i>rs11586055C&gt;G</i>          | Intron9  | 132 (24.16±15.37)     | 29 (24.82±20.08) | 2 (18.93±21.31)  | 0.89                 | 0.96                 | 0.71                 |
| <i>rs1771459G&gt;A</i>           | Intron9  | 79 (22.32±13.57)      | 60 (27.04±17.91) | 24 (23.37±19.43) | 0.32                 | 0.13                 | 0.90                 |
| <i>rs1757133C&gt;T</i>           | Intron9  | 116 (23.92±15.08)     | 43 (25.45±19.45) | 4 (19.24±13.42)  | 0.94                 | 0.76                 | 0.50                 |
| <i>rs6701173G&gt;A</i>           | Intron9  | 97 (25.49±16.59)      | 58 (22.39±15.97) | 8 (21.91±14.20)  | 0.29                 | 0.26                 | 0.75                 |
| <i>rs3856331G&gt;A</i>           | Intron9  | 97 (25.49±16.59)      | 58 (22.39±15.97) | 8 (21.91±14.20)  | 0.29                 | 0.26                 | 0.75                 |
| <i>rs12077365T&gt;C</i>          | Intron11 | 116 (23.54±15.16)     | 42 (26.93±19.05) | 5 (16.98±14.35)  | 0.53                 | 0.28                 | 0.36                 |
| <i>rs1888680A&gt;T</i>           | Intron12 | 54 (23.43±18.20)      | 75 (25.45±16.29) | 34 (22.71±12.73) | 0.77                 | 0.78                 | 0.40                 |
| <i>rs6426493G&gt;A</i>           | Intron12 | 54 (23.43±18.20)      | 74 (25.18±16.22) | 35 (23.37±13.14) | 0.89                 | 0.78                 | 0.57                 |
| <i>rs1411912C&gt;A</i>           | Intron13 | 54 (23.43±18.20)      | 75 (25.45±16.29) | 34 (22.71±12.73) | 0.77                 | 0.78                 | 0.40                 |
| <i>rs10158275G&gt;T</i>          | Intron14 | 51 (23.96±13.63)      | 93 (24.77±17.97) | 19 (22.14±14.25) | 0.92                 | 0.67                 | 0.68                 |
| <i>rs4653544G&gt;A</i>           | Intron14 | 81 (23.76±17.96)      | 65 (25.15±14.92) | 17 (22.75±12.80) | 0.99                 | 0.74                 | 0.61                 |
| <i>rs287606G&gt;A</i>            | Intron15 | 100 (25.48±16.95)     | 56 (22.17±15.08) | 7 (22.31±15.28)  | 0.27                 | 0.24                 | 0.79                 |
| <i>rs397637G&gt;T</i>            | Intron16 | 100 (25.48±16.95)     | 56 (22.17±15.08) | 7 (22.31±15.28)  | 0.27                 | 0.24                 | 0.79                 |
| <i>rs391597A&gt;T</i>            | Intron16 | 100 (25.48±16.95)     | 56 (22.17±15.08) | 7 (22.31±15.28)  | 0.27                 | 0.24                 | 0.79                 |
| <i>rs1108210A&gt;C</i>           | Intron16 | 116 (23.54±15.16)     | 42 (26.93±19.05) | 5 (16.98±14.35)  | 0.53                 | 0.28                 | 0.36                 |
| <i>rs878388G&gt;A</i>            | Intron16 | 53 (23.13±17.84)      | 77 (25.38±16.52) | 33 (23.22±12.84) | 0.92                 | 0.66                 | 0.49                 |
| <i>rs549590T&gt;C</i>            | Intron17 | 100 (25.48±16.95)     | 56 (22.17±15.08) | 7 (22.31±15.28)  | 0.27                 | 0.24                 | 0.79                 |
| <i>rs424645C&gt;T</i>            | Intron17 | 99 (25.74±16.84)      | 57 (21.79±15.23) | 7 (22.31±15.28)  | 0.19                 | 0.15                 | 0.79                 |
| <i>rs1188722C&gt;T (L2116F)</i>  | Exon23   | 87 (22.61±16.71)      | 56 (27.03±16.55) | 20 (23.31±12.53) | 0.54                 | 0.25                 | 0.64                 |
| <i>rs867599C&gt;A</i>            | Intron25 | 93 (22.78±16.51)      | 56 (27.19±16.18) | 14 (21.82±13.97) | 0.62                 | 0.27                 | 0.43                 |
| <i>rs3795782T&gt;C</i>           | Intron27 | 110 (23.40±14.70)     | 48 (26.91±19.43) | 5 (16.19±13.47)  | 0.65                 | 0.35                 | 0.25                 |
| <i>rs11581037C&gt;G</i>          | Intron28 | 134 (24.43±15.60)     | 27 (23.51±19.47) | 2 (18.93±21.31)  | 0.61                 | 0.64                 | 0.71                 |
| <i>rs12061320G&gt;A (V2648V)</i> | Exon31   | 83 (23.10±15.56)      | 59 (27.19±17.36) | 21 (20.24±14.94) | 0.87                 | 0.32                 | 0.25                 |
| <i>rs3795785C&gt;T (R2812W)</i>  | Exon32   | 87 (22.65±15.36)      | 59 (27.60±18.00) | 17 (20.47±12.66) | 0.54                 | 0.16                 | 0.35                 |
| <i>rs1150906G&gt;T</i>           | Intron33 | 98 (25.99±16.73)      | 58 (21.43±15.34) | 7 (22.31±15.28)  | 0.14                 | 0.10                 | 0.79                 |
| <i>rs3795790A&gt;T (S3373C)</i>  | Exon39   | 82 (22.82±15.18)      | 58 (27.14±17.51) | 21 (20.24±14.94) | 0.77                 | 0.25                 | 0.29                 |
| <i>rs4653938C&gt;G</i>           | Intron39 | 47 (23.66±18.31)      | 65 (26.48±15.93) | 51 (21.82±14.46) | 0.48                 | 0.87                 | 0.18                 |
| <i>rs1150909C&gt;T</i>           | Intron43 | 88 (22.96±16.71)      | 55 (26.54±16.69) | 20 (23.31±12.53) | 0.67                 | 0.36                 | 0.64                 |
| <i>rs1150910C&gt;T</i>           | Intron44 | 98 (25.99±16.73)      | 58 (21.43±15.34) | 7 (22.31±15.28)  | 0.14                 | 0.10                 | 0.79                 |
| <i>rs207951A&gt;T</i>            | Intron50 | 87 (22.88±16.79)      | 56 (26.60±16.55) | 20 (23.31±12.53) | 0.66                 | 0.35                 | 0.64                 |
| <i>rs2087121G&gt;A</i>           | Intron50 | 47 (23.66±18.31)      | 64 (26.43±16.05) | 52 (21.98±14.36) | 0.49                 | 0.87                 | 0.19                 |
| <i>rs1188729G&gt;C (C4642S)</i>  | Exon54   | 88 (22.96±16.71)      | 55 (26.54±16.69) | 20 (23.31±12.53) | 0.67                 | 0.36                 | 0.64                 |
| <i>rs6700528G&gt;A</i>           | Intron57 | 58 (22.80±15.16)      | 71 (25.92±16.41) | 34 (23.04±17.78) | 0.68                 | 0.37                 | 0.76                 |
| <i>rs369909G&gt;C (L5269V)</i>   | Exon59   | 98 (25.99±16.73)      | 53 (20.23±14.90) | 7 (22.31±15.28)  | 0.09                 | 0.05                 | 0.85                 |
| <i>rs1188710C&gt;G (E5891Q)</i>  | Exon73   | 51 (22.02±14.66)      | 80 (25.67±18.33) | 32 (24.06±12.78) | 0.61                 | 0.29                 | 0.73                 |
| <i>rs369252C&gt;A</i>            | Intron76 | 88 (22.96±16.71)      | 54 (26.29±16.75) | 21 (24.10±12.74) | 0.60                 | 0.36                 | 0.79                 |
| <i>rs12096217G&gt;A</i>          | Intron76 | 135 (23.85±15.56)     | 26 (25.59±20.05) | 2 (30.90±11.46)  | 0.46                 | 0.50                 | 0.60                 |
| <i>rs729258C&gt;T</i>            | Intron77 | 94 (26.70±16.62)      | 62 (20.66±15.30) | 7 (22.31±15.28)  | 0.05                 | <b>0.03</b>          | 0.79                 |
| <i>rs3795811C&gt;T</i>           | Intron78 | 84 (23.03±15.48)      | 61 (26.36±17.71) | 18 (22.44±14.55) | 0.59                 | 0.30                 | 0.62                 |
| <i>rs3795812A&gt;G</i>           | Intron79 | 93 (26.49±16.59)      | 62 (20.92±15.59) | 8 (23.28±14.41)  | 0.09                 | 0.05                 | 0.85                 |
| <i>rs3795814C&gt;T</i>           | Intron80 | 83 (22.75±15.37)      | 62 (26.68±17.74) | 18 (22.44±14.55) | 0.48                 | 0.20                 | 0.62                 |
| <i>rs16848509C&gt;T</i>          | Intron81 | 51 (22.02±14.66)      | 80 (25.67±18.33) | 32 (24.06±12.78) | 0.61                 | 0.29                 | 0.73                 |
| <i>rs11582927C&gt;T</i>          | Intron81 | 118 (23.92±15.44)     | 39 (25.46±19.09) | 3 (14.32±11.18)  | 0.88                 | 0.85                 | 0.23                 |
| <i>rs12061490A&gt;G</i>          | Intron81 | 84 (23.03±15.48)      | 60 (25.90±17.48) | 19 (24.12±15.91) | 0.44                 | 0.30                 | 1.00                 |

Genotype distribution of each SNP is presented as the number of subjects (FEV1 decline%, mean±SEM).

*p*-Values are adjusted with initial diagnosed age, sex, smoking, atopy, and body mass index.

Bold values indicate the statistical significance (*p*<0.05).

C/C, C/R, and R/R indicate the homozygote of the common allele, and the heterozygote and homozygote of the rare allele, respectively.

*P<sub>a</sub>*, *P<sub>b</sub>*, and *P<sub>c</sub>* indicate the *p*-value of co-dominant, dominant, and recessive models, respectively.

SUPPLEMENTARY TABLE 3. ASSOCIATIONS OF *OBSCN* POLYMORPHISMS WITH FORCED EXPIRATORY VOLUME IN 1 s DECLINE BY ASPIRIN PROVOCATION IN ASPIRIN-TOLERANT ASTHMA SUBJECTS

| SNP (AA change)                 | Position | Genotype distribution |                   |                  | <i>Pa</i> | <i>Pb</i>   | <i>Pc</i> |
|---------------------------------|----------|-----------------------|-------------------|------------------|-----------|-------------|-----------|
|                                 |          | C/C                   | C/R               | R/R              |           |             |           |
| <i>rs10157526A</i> > G          | Intron8  | 294 (3.81 ± 4.82)     | 127 (2.91 ± 4.82) | 8 (3.75 ± 6.00)  | 0.19      | 0.14        | 0.91      |
| <i>rs10916282C</i> > A          | Intron8  | 294 (3.81 ± 4.82)     | 127 (2.91 ± 4.82) | 8 (3.75 ± 6.00)  | 0.19      | 0.14        | 0.91      |
| <i>rs12063816A</i> > G          | Intron8  | 347 (3.63 ± 4.82)     | 78 (3.10 ± 5.01)  | 3 (4.00 ± 6.08)  | 0.55      | 0.50        | 0.86      |
| <i>rs1757157T</i> > C           | Intron8  | 211 (3.15 ± 4.96)     | 186 (3.81 ± 4.81) | 32 (4.60 ± 4.13) | 0.05      | 0.09        | 0.16      |
| <i>rs17640616G</i> > C          | Intron8  | 373 (3.68 ± 4.79)     | 55 (2.69 ± 5.21)  | 1 (0.00)         | 0.12      | 0.13        | 0.58      |
| <i>rs1757149T</i> > C           | Intron9  | 168 (4.03 ± 4.73)     | 210 (3.26 ± 5.04) | 51 (3.10 ± 4.34) | 0.12      | 0.10        | 0.50      |
| <i>rs1629294T</i> > G           | Intron9  | 157 (4.09 ± 4.82)     | 214 (3.29 ± 4.80) | 55 (2.95 ± 5.17) | 0.09      | 0.08        | 0.37      |
| <i>rs1771462C</i> > G           | Intron9  | 165 (4.15 ± 4.71)     | 214 (3.22 ± 4.89) | 50 (2.92 ± 4.96) | 0.06      | 0.05        | 0.35      |
| <i>rs2776856T</i> > C           | Intron9  | 155 (4.03 ± 4.75)     | 219 (3.36 ± 4.89) | 55 (2.90 ± 4.91) | 0.10      | 0.13        | 0.29      |
| <i>rs2776855A</i> > C           | Intron9  | 285 (3.63 ± 4.91)     | 133 (3.32 ± 4.81) | 11 (4.05 ± 3.86) | 0.67      | 0.54        | 0.72      |
| <i>rs10916287C</i> > T          | Intron9  | 283 (3.73 ± 4.85)     | 134 (3.15 ± 4.79) | 12 (3.38 ± 5.61) | 0.35      | 0.33        | 0.83      |
| <i>rs11586055C</i> > G          | Intron9  | 337 (3.49 ± 4.98)     | 86 (3.52 ± 4.36)  | 6 (6.67 ± 3.20)  | 0.49      | 0.75        | 0.12      |
| <i>rs1771459G</i> > A           | Intron9  | 171 (4.07 ± 4.81)     | 210 (3.25 ± 4.81) | 48 (2.94 ± 5.05) | 0.08      | 0.08        | 0.37      |
| <i>rs1757133C</i> > T           | Intron9  | 285 (3.63 ± 4.91)     | 133 (3.32 ± 4.81) | 11 (4.05 ± 3.86) | 0.67      | 0.54        | 0.72      |
| <i>rs6701173G</i> > A           | Intron9  | 242 (3.55 ± 4.90)     | 171 (3.39 ± 4.86) | 16 (5.09 ± 3.76) | 0.69      | 1.00        | 0.23      |
| <i>rs3856331G</i> > A           | Intron9  | 242 (3.55 ± 4.90)     | 171 (3.39 ± 4.86) | 16 (5.09 ± 3.76) | 0.69      | 1.00        | 0.23      |
| <i>rs12077365T</i> > C          | Intron11 | 283 (3.73 ± 4.85)     | 134 (3.15 ± 4.79) | 12 (3.38 ± 5.61) | 0.35      | 0.33        | 0.83      |
| <i>rs1888680A</i> > T           | Intron12 | 149 (3.21 ± 4.73)     | 220 (3.50 ± 4.99) | 60 (4.50 ± 4.54) | 0.13      | 0.29        | 0.14      |
| <i>rs6426493G</i> > A           | Intron12 | 144 (3.15 ± 4.78)     | 221 (3.62 ± 4.88) | 64 (4.17 ± 4.88) | 0.18      | 0.22        | 0.35      |
| <i>rs1411912C</i> > A           | Intron13 | 148 (3.20 ± 4.74)     | 221 (3.51 ± 4.99) | 60 (4.50 ± 4.54) | 0.12      | 0.27        | 0.14      |
| <i>rs10158275G</i> > T          | Intron14 | 139 (3.99 ± 4.66)     | 225 (3.34 ± 5.00) | 64 (3.30 ± 4.73) | 0.31      | 0.26        | 0.67      |
| <i>rs4653544G</i> > A           | Intron14 | 205 (3.18 ± 4.86)     | 187 (3.72 ± 4.94) | 37 (4.68 ± 4.14) | 0.07      | 0.13        | 0.12      |
| <i>rs287606G</i> > A            | Intron15 | 256 (3.62 ± 4.88)     | 160 (3.28 ± 4.85) | 13 (5.34 ± 4.08) | 0.90      | 0.75        | 0.19      |
| <i>rs397637G</i> > T            | Intron16 | 256 (3.62 ± 4.88)     | 161 (3.33 ± 4.88) | 12 (4.78 ± 3.72) | 0.98      | 0.75        | 0.38      |
| <i>rs391597A</i> > T            | Intron16 | 256 (3.62 ± 4.88)     | 161 (3.33 ± 4.88) | 12 (4.78 ± 3.72) | 0.98      | 0.75        | 0.38      |
| <i>rs1108210A</i> > C           | Intron16 | 281 (3.71 ± 4.84)     | 135 (3.21 ± 4.83) | 13 (3.35 ± 5.38) | 0.42      | 0.40        | 0.84      |
| <i>rs878388G</i> > A            | Intron16 | 151 (3.09 ± 4.70)     | 222 (3.70 ± 4.87) | 56 (4.11 ± 5.11) | 0.15      | 0.17        | 0.41      |
| <i>rs549590T</i> > C            | Intron17 | 254 (3.63 ± 4.89)     | 163 (3.31 ± 4.86) | 12 (4.78 ± 3.72) | 0.92      | 0.68        | 0.38      |
| <i>rs424645C</i> > T            | Intron17 | 249 (3.60 ± 4.92)     | 168 (3.37 ± 4.82) | 12 (4.78 ± 3.72) | 0.95      | 0.83        | 0.38      |
| <i>rs1188722C</i> > T (L2116F)  | Exon23   | 242 (3.07 ± 4.81)     | 165 (4.31 ± 4.82) | 21 (3.11 ± 5.04) | 0.09      | <b>0.03</b> | 0.64      |
| <i>rs867599C</i> > A            | Intron25 | 256 (3.39 ± 4.93)     | 153 (3.83 ± 4.61) | 20 (3.29 ± 5.64) | 0.69      | 0.51        | 0.67      |
| <i>rs3795782T</i> > C           | Intron27 | 274 (3.68 ± 4.90)     | 140 (3.36 ± 4.58) | 15 (2.85 ± 6.37) | 0.36      | 0.40        | 0.55      |
| <i>rs11581037C</i> > G          | Intron28 | 342 (3.45 ± 4.98)     | 81 (3.70 ± 4.32)  | 6 (6.67 ± 3.20)  | 0.29      | 0.48        | 0.12      |
| <i>rs12061320G</i> > A (V2648V) | Exon31   | 186 (3.59 ± 4.95)     | 203 (3.61 ± 4.67) | 40 (3.00 ± 5.35) | 0.73      | 0.92        | 0.55      |
| <i>rs3795785C</i> > T (R2812W)  | Exon32   | 214 (3.52 ± 4.95)     | 188 (3.77 ± 4.64) | 27 (2.13 ± 5.41) | 0.62      | 0.92        | 0.15      |
| <i>rs1150906G</i> > T           | Intron33 | 248 (3.65 ± 4.88)     | 165 (3.39 ± 4.82) | 16 (3.49 ± 4.86) | 0.64      | 0.62        | 0.90      |
| <i>rs3795790A</i> > T (S3373C)  | Exon39   | 184 (3.54 ± 4.97)     | 202 (3.63 ± 4.67) | 40 (3.00 ± 5.35) | 0.81      | 0.97        | 0.56      |
| <i>rs4653938C</i> > G           | Intron39 | 116 (3.11 ± 4.99)     | 221 (3.59 ± 4.71) | 92 (3.97 ± 5.00) | 0.22      | 0.30        | 0.34      |
| <i>rs1150909C</i> > T           | Intron43 | 240 (3.07 ± 4.85)     | 167 (4.27 ± 4.77) | 21 (3.34 ± 5.01) | 0.08      | <b>0.03</b> | 0.82      |
| <i>rs1150910C</i> > T           | Intron44 | 249 (3.62 ± 4.85)     | 166 (3.45 ± 4.84) | 14 (3.31 ± 5.16) | 0.69      | 0.72        | 0.81      |
| <i>rs207951A</i> > T            | Intron50 | 240 (3.07 ± 4.85)     | 167 (4.26 ± 4.78) | 22 (3.20 ± 4.93) | 0.09      | <b>0.03</b> | 0.73      |
| <i>rs2087121G</i> > A           | Intron50 | 117 (3.14 ± 4.98)     | 219 (3.59 ± 4.72) | 93 (3.93 ± 4.99) | 0.26      | 0.35        | 0.38      |
| <i>rs1188729G</i> > C (C4642S)  | Exon54   | 240 (3.07 ± 4.85)     | 168 (4.24 ± 4.77) | 21 (3.34 ± 5.01) | 0.08      | <b>0.03</b> | 0.82      |
| <i>rs6700528G</i> > A           | Intron57 | 128 (3.88 ± 4.69)     | 219 (3.62 ± 4.83) | 82 (2.83 ± 5.12) | 0.16      | 0.38        | 0.15      |
| <i>rs369909G</i> > C (L5269V)   | Exon59   | 250 (3.64 ± 4.86)     | 159 (3.39 ± 4.90) | 14 (3.31 ± 5.16) | 0.61      | 0.62        | 0.80      |
| <i>rs1188710C</i> > G (E5891Q)  | Exon73   | 134 (2.89 ± 4.84)     | 230 (3.88 ± 4.95) | 64 (3.68 ± 4.44) | 0.18      | 0.08        | 0.86      |
| <i>rs369252C</i> > A            | Intron76 | 240 (3.09 ± 4.84)     | 168 (4.21 ± 4.78) | 21 (3.34 ± 5.01) | 0.10      | <b>0.04</b> | 0.82      |
| <i>rs12096217G</i> > A          | Intron76 | 346 (3.54 ± 4.80)     | 77 (3.59 ± 5.15)  | 6 (3.33 ± 4.23)  | 0.92      | 0.90        | 0.96      |
| <i>rs729258C</i> > T            | Intron77 | 239 (3.67 ± 4.88)     | 171 (3.35 ± 4.85) | 19 (3.62 ± 4.64) | 0.64      | 0.58        | 0.99      |
| <i>rs3795811C</i> > T           | Intron78 | 194 (3.53 ± 4.89)     | 199 (3.64 ± 4.73) | 36 (3.08 ± 5.33) | 0.89      | 0.93        | 0.65      |
| <i>rs3795812A</i> > G           | Intron79 | 229 (3.80 ± 4.83)     | 178 (3.16 ± 4.92) | 21 (3.94 ± 4.52) | 0.42      | 0.28        | 0.74      |
| <i>rs3795814C</i> > T           | Intron80 | 187 (3.59 ± 4.82)     | 202 (3.64 ± 4.83) | 40 (2.84 ± 5.15) | 0.65      | 0.92        | 0.41      |
| <i>rs16848509C</i> > T          | Intron81 | 134 (2.89 ± 4.84)     | 231 (3.88 ± 4.94) | 64 (3.68 ± 4.44) | 0.18      | 0.08        | 0.87      |
| <i>rs11582927C</i> > T          | Intron81 | 291 (3.61 ± 4.92)     | 128 (3.26 ± 4.75) | 7 (4.73 ± 4.09)  | 0.68      | 0.54        | 0.56      |
| <i>rs12061490A</i> > G          | Intron81 | 194 (3.53 ± 4.89)     | 199 (3.64 ± 4.73) | 36 (3.08 ± 5.33) | 0.89      | 0.93        | 0.65      |

Genotype distribution of each SNP is presented as the number of subjects (FEV1 decline%, mean ± SEM).

*p*-Values are adjusted with initial diagnosed age, sex, smoking, atopy, and body mass index.

Bold values indicate the statistical significance (*p* < 0.05).

C/C, C/R, and R/R indicate the homozygote of the common allele, and the heterozygote and homozygote of the rare allele, respectively.

*Pa*, *Pb*, and *Pc* indicate the *p*-value of co-dominant, dominant, and recessive models, respectively.

SUPPLEMENTARY TABLE 4. ASSOCIATIONS OF *OBSCN* HAPLOTYPES WITH FORCED EXPIRATORY VOLUME IN 1 s DECLINE BY ASPIRIN PROVOCATION

| Subject group          | LD block       | Haplotype       | Haplotype distribution |                   |                  | <i>Pa</i>       | <i>Pb</i> | <i>Pc</i> |      |
|------------------------|----------------|-----------------|------------------------|-------------------|------------------|-----------------|-----------|-----------|------|
|                        |                |                 | -/-                    | -/+               | +/+              |                 |           |           |      |
| In total<br>asthmatics | Block 1        | <i>BL1_ht1</i>  | 376 (9.57±13.68)       | 200 (8.36±12.31)  | 16 (12.09±13.31) | 0.76            | 0.51      | 0.34      |      |
|                        |                | <i>BL1_ht2</i>  | 445 (9.36±13.58)       | 137 (8.93±12.15)  | 10 (7.72±11.99)  | 0.51            | 0.59      | 0.49      |      |
|                        |                | <i>BL1_ht3</i>  | 476 (9.36±13.23)       | 108 (8.65±13.43)  | 8 (9.73±10.22)   | 0.79            | 0.77      | 0.99      |      |
|                        | Block 2        | <i>BL2_ht1</i>  | 335 (8.51±13.13)       | 216 (9.62±13.17)  | 41 (13.08±13.76) | 0.08            | 0.20      | 0.08      |      |
|                        |                | <i>BL2_ht2</i>  | 353 (9.88±13.94)       | 218 (8.15±11.97)  | 21 (9.65±13.10)  | 0.30            | 0.19      | 0.77      |      |
|                        |                | <i>BL2_ht3</i>  | 382 (9.42±13.48)       | 187 (8.74±12.60)  | 23 (10.15±14.29) | 0.70            | 0.59      | 0.81      |      |
|                        | In AERD        | Block 1         | <i>BL1_ht1</i>         | 105 (24.87±16.93) | 52 (23.00±14.98) | 6 (23.20±16.55) | 0.62      | 0.57      | 0.99 |
|                        |                |                 | <i>BL1_ht2</i>         | 124 (24.50±16.84) | 35 (24.09±14.39) | 4 (16.23±13.90) | 0.49      | 0.67      | 0.31 |
|                        |                |                 | <i>BL1_ht3</i>         | 134 (24.43±15.60) | 27 (23.51±19.47) | 2 (18.93±21.31) | 0.61      | 0.64      | 0.71 |
| Block 2                |                | <i>BL2_ht1</i>  | 90 (23.22±16.86)       | 53 (26.23±16.49)  | 20 (23.31±12.53) | 0.80            | 0.50      | 0.64      |      |
|                        |                | <i>BL2_ht2</i>  | 98 (25.99±16.73)       | 58 (21.43±15.34)  | 7 (22.31±15.28)  | 0.14            | 0.10      | 0.79      |      |
|                        |                | <i>BL2_ht3</i>  | 110 (23.82±16.78)      | 43 (25.74±15.60)  | 10 (21.90±13.70) | 0.84            | 0.62      | 0.65      |      |
| Block 1                |                | <i>BL1_ht1</i>  | 271 (3.65±4.81)        | 148 (3.22±4.98)   | 10 (5.42±3.36)   | 0.86            | 0.57      | 0.24      |      |
|                        |                | <i>BL1_ht2</i>  | 321 (3.51±4.86)        | 102 (3.73±4.71)   | 6 (2.05±6.80)    | 0.95            | 0.81      | 0.50      |      |
|                        |                | <i>BL1_ht3</i>  | 342 (3.45±4.98)        | 81 (3.70±4.32)    | 6 (6.67±3.20)    | 0.29            | 0.48      | 0.12      |      |
| Block 2                | <i>BL2_ht1</i> | 245 (3.11±4.82) | 163 (4.22±4.82)        | 21 (3.34±5.01)    | 0.09             | <b>0.04</b>     | 0.82      |           |      |
|                        | <i>BL2_ht2</i> | 255 (3.68±4.85) | 160 (3.34±4.85)        | 14 (3.31±5.16)    | 0.51             | 0.51            | 0.81      |           |      |
| In ATA                 |                | <i>BL2_ht3</i>  | 272 (3.60±4.89)        | 144 (3.66±4.69)   | 13 (1.12±5.46)   | 0.41            | 0.72      | 0.10      |      |

Haplotype distribution is presented as the number of subjects (FEV1 decline%, mean±SEM).

-/-, -/+ and +/+ are the distributions having none, one, and both of the indicated haplotype, respectively.

*p*-Values are adjusted with initial diagnosed age, sex, smoking, and atopy.

Bold values indicate the statistical significance ( $p < 0.05$ ).

*Pa*, *Pb*, and *Pc* indicate the *p*-value of co-dominant, dominant, and recessive models, respectively.

AERD, aspirin exacerbated respiratory disease; ATA, aspirin-tolerant asthma; LD, linkage disequilibrium.



SUPPLEMENTARY TABLE 5. MINOR ALLELE FREQUENCIES OF *OBSCN* SINGLE-NUCLEOTIDE POLYMORPHISMS AMONG KOREAN ASTHMATICS AND OTHER ASIAN POPULATIONS

| SNP (AA change)                    | Position | MAF                                   |                |                 |
|------------------------------------|----------|---------------------------------------|----------------|-----------------|
|                                    |          | Korean asthmatics (n=592, this study) | Chinese (n=86) | Japanese (n=89) |
| rs10157526A>G                      | Intron8  | 0.165                                 | 0.173          | 0.128           |
| rs10916282C>A                      | Intron8  | 0.165                                 | 0.189          | 0.144           |
| rs12063816A>G                      | Intron8  | 0.101                                 | 0.133          | 0.089           |
| rs1757157T>C                       | Intron8  | 0.288                                 | 0.395          | 0.267           |
| rs17640616G>C                      | Intron8  | 0.064                                 | 0.054          | 0.087           |
| rs1757149T>C                       | Intron9  | 0.355                                 | 0.321          | 0.337           |
| rs1629294T>G                       | Intron9  | 0.375                                 | 0.333          | 0.343           |
| rs1771462C>G                       | Intron9  | 0.358                                 | 0.341          | 0.262           |
| rs2776856T>C <sup>a</sup>          | Intron9  | 0.374                                 | 0.357          | 0.331           |
| rs2776855A>C                       | Intron9  | 0.172                                 | 0.137          | 0.174           |
| rs10916287C>T                      | Intron9  | 0.181                                 | 0.211          | 0.156           |
| rs11586055C>G                      | Intron9  | 0.108                                 | 0.077          | 0.087           |
| rs1771459G>A                       | Intron9  | 0.351                                 | 0.315          | 0.315           |
| rs1757133C>T                       | Intron9  | 0.172                                 | 0.114          | 0.133           |
| rs6701173G>A                       | Intron9  | 0.234                                 | 0.133          | 0.307           |
| rs3856331G>A                       | Intron9  | 0.234                                 | 0.181          | 0.333           |
| rs12077365T>C                      | Intron11 | 0.181                                 | 0.214          | 0.145           |
| rs1888680A>T                       | Intron12 | 0.407                                 | 0.511          | 0.420           |
| rs6426493G>A                       | Intron12 | 0.415                                 | 0.523          | 0.432           |
| rs1411912C>A                       | Intron13 | 0.408                                 | 0.470          | 0.390           |
| rs10158275G>T                      | Intron14 | 0.413                                 | 0.344          | 0.430           |
| rs4653544G>A                       | Intron14 | 0.304                                 | 0.369          | 0.279           |
| rs287606G>A                        | Intron15 | 0.216                                 | 0.167          | 0.276           |
| rs397637G>T                        | Intron16 | 0.215                                 | 0.167          | 0.279           |
| rs391597A>T                        | Intron16 | 0.215                                 | 0.067          | 0.263           |
| rs1108210A>C                       | Intron16 | 0.185                                 | 0.216          | 0.174           |
| rs878388G>A                        | Intron16 | 0.402                                 | 0.470          | 0.384           |
| rs549590T>C                        | Intron17 | 0.216                                 | 0.161          | 0.285           |
| rs424645C>T                        | Intron17 | 0.221                                 | 0.161          | 0.308           |
| rs1188722C>T (L2116F) <sup>a</sup> | Exon23   | 0.258                                 | 0.321          | 0.256           |
| rs867599C>A                        | Intron25 | 0.233                                 | 0.304          | 0.203           |
| rs3795782T>C                       | Intron27 | 0.190                                 | 0.143          | 0.180           |
| rs11581037C>G                      | Intron28 | 0.103                                 | 0.070          | 0.056           |
| rs12061320G>A (V2648V)             | Exon31   | 0.327                                 | 0.405          | 0.278           |
| rs3795785C>T (R2812W)              | Exon32   | 0.283                                 | 0.356          | 0.273           |
| rs1150906G>T                       | Intron33 | 0.226                                 | 0.169          | 0.326           |
| rs3795790A>T (S3373C)              | Exon39   | 0.328                                 | 0.422          | 0.273           |
| rs4653938C>G <sup>a</sup>          | Intron39 | 0.483                                 | 0.556          | 0.420           |
| rs1150909C>T <sup>a</sup>          | Intron43 | 0.258                                 | 0.337          | 0.200           |
| rs1150910C>T                       | Intron44 | 0.224                                 | 0.167          | 0.318           |
| rs207951A>T <sup>a</sup>           | Intron50 | 0.260                                 | 0.344          | 0.261           |
| rs2087121G>A <sup>a</sup>          | Intron50 | 0.484                                 | 0.488          | 0.471           |
| rs1188729G>C (C4642S) <sup>a</sup> | Exon54   | 0.259                                 | 0.333          | 0.244           |
| rs6700528G>A                       | Intron57 | 0.441                                 | 0.511          | 0.364           |
| rs369909G>C (L5269V)               | Exon59   | 0.218                                 | 0.100          | 0.330           |
| rs1188710C>G (E5891Q)              | Exon73   | 0.425                                 | 0.456          | 0.375           |
| rs369252C>A <sup>a</sup>           | Intron76 | 0.260                                 | 0.333          | 0.220           |
| rs12096217G>A                      | Intron76 | 0.105                                 | 0.149          | 0.105           |
| rs729258C>T                        | Intron77 | 0.240                                 | 0.185          | 0.320           |
| rs3795811C>T                       | Intron78 | 0.312                                 | 0.333          | 0.297           |
| rs3795812A>G                       | Intron79 | 0.251                                 | 0.190          | 0.326           |
| rs3795814C>T                       | Intron80 | 0.321                                 | 0.339          | 0.302           |
| rs16848509C>T                      | Intron81 | 0.425                                 | 0.464          | 0.372           |
| rs11582927C>T                      | Intron81 | 0.158                                 | 0.125          | 0.169           |
| rs12061490A>G                      | Intron81 | 0.312                                 | 0.333          | 0.297           |

The MAFs of Chinese and Japanese are obtained from the International HapMap Project database (<http://hapmap.ncbi.nlm.nih.gov/index.html.en>).

<sup>a</sup>SNPs show significant associations with AERD in a comparison between Korean AERD patients and ATA subjects.

AA, amino acid; MAF, minor allele frequency.

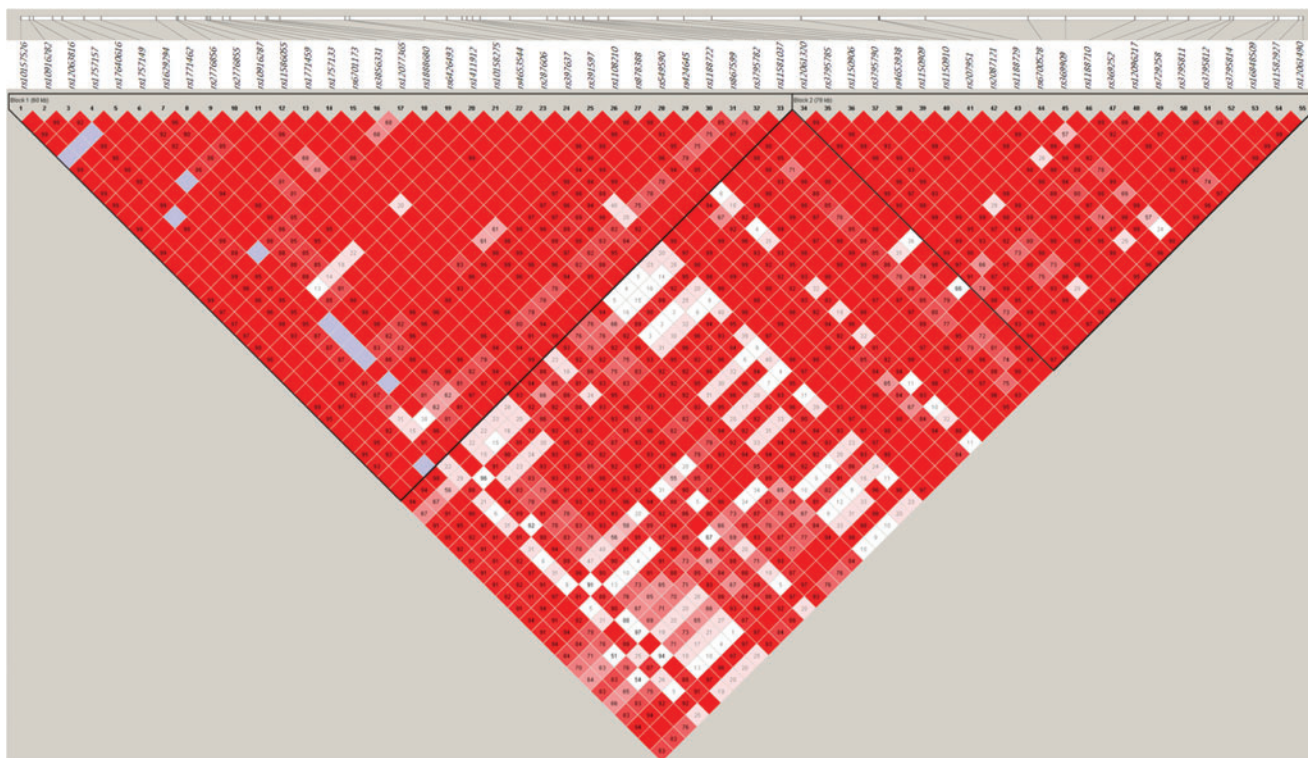

**SUPPLEMENTARY FIG. S1.** Linkage disequilibrium (LD) plot of *OBSCN* polymorphisms investigated in this study. LD number in blocks represents values of multiallelic  $D'$ . Color scheme indicates logarithm of odds (LOD) score  $\geq 2$  and  $D'=1$  in bright red; LOD  $\geq 2$  and  $D' < 1$  in shades of pink/red; LOD  $< 2$  and  $D'=1$  in blue; LOD  $< 2$  and  $D' < 1$  in white.

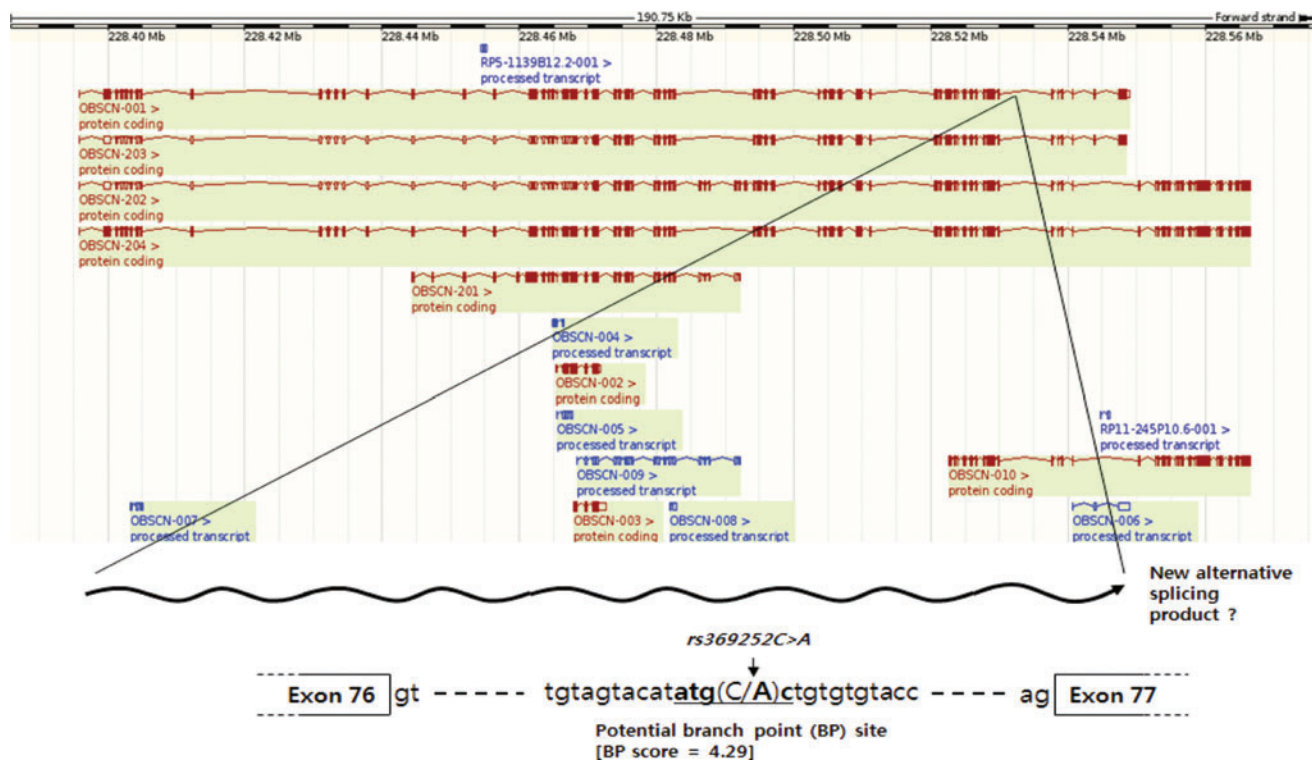

**SUPPLEMENTARY FIG. S2.** *In silico* analysis of rs369252C>A for branch point (BP) site for alternative splicing. Prediction is performed using EMBL-EBI splice site prediction ([www.ebi.ac.uk/asd-srv/wb.cgi?method=2](http://www.ebi.ac.uk/asd-srv/wb.cgi?method=2)). Currently discovered alternative transcripts of *OBSCN* are derived from the Ensembl genome Browser ([www.ensembl.org/index.html](http://www.ensembl.org/index.html)).
